# Supplementary material for: Dual amplification strategy of highly sensitive thrombin amperometric aptasensor based on chitosan–Au nanocomposites
Source: Royal Society of Chemistry journal article supplement (doi:10.1039/c2an35340g), 2012-01-01
Supplement: c2an35340g.pdf [file c2an35340g.pdf]

*Supplemental Data for*

**Dual Amplification Strategy of Highly Sensitive thrombin Amperometric Aptasensor Based  
on Chitosan -Au nanocomposites**

Jie Zhao<sup>1</sup>, Fanbo Lin<sup>1</sup>, Yinhui Yi<sup>1</sup>, Yan Huang<sup>2</sup>, Haitao Li<sup>1</sup>, Youyu Zhang<sup>1\*</sup>, Shouzhuo Yao<sup>1,2</sup>

<sup>1</sup>Key Laboratory of Chemical Biology and Traditional Chinese Medicine Research (Ministry of Education),  
College of Chemistry and Chemical Engineering, Hunan Normal University, Changsha 410081, PR China

<sup>2</sup> State Key Laboratory of Chemo/Biosensing and Chemometrics, College of Chemistry and Chemical  
Engineering, Hunan University, Changsha 410082, PR China

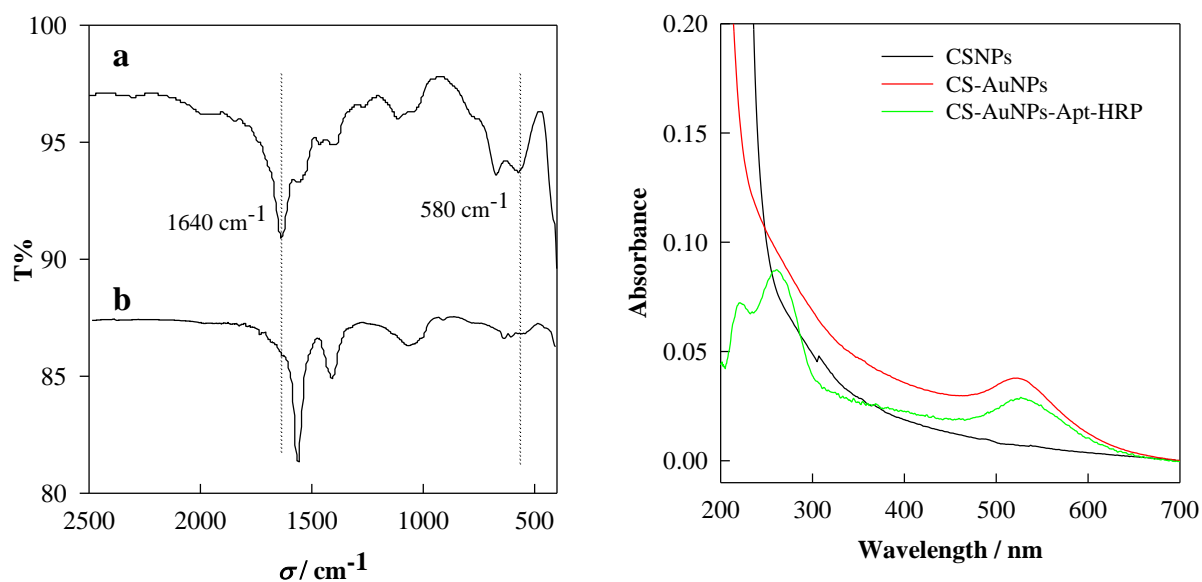

Fig. S1 (A) FT-IR spectra of CS-SH (a) and CS (b). (B) UV-Vis absorption spectra of CSNPs, CS-AuNPs and CS-AuNPs-HRP/Apt2 composites.
